# Supplementary material for: Bi2O3 modified TiO2 nanotube arrays and their application towards unsymmetrical dimethylhydrazine degradation in wastewater by electroassisted photocatalysis
Source: Royal Society of Chemistry journal article supplement (doi:10.1039/d2ra05953c), 2023-01-01
Supplement: d2ra05953c1.pdf [file d2ra05953c1.pdf]

## Supplementary Information

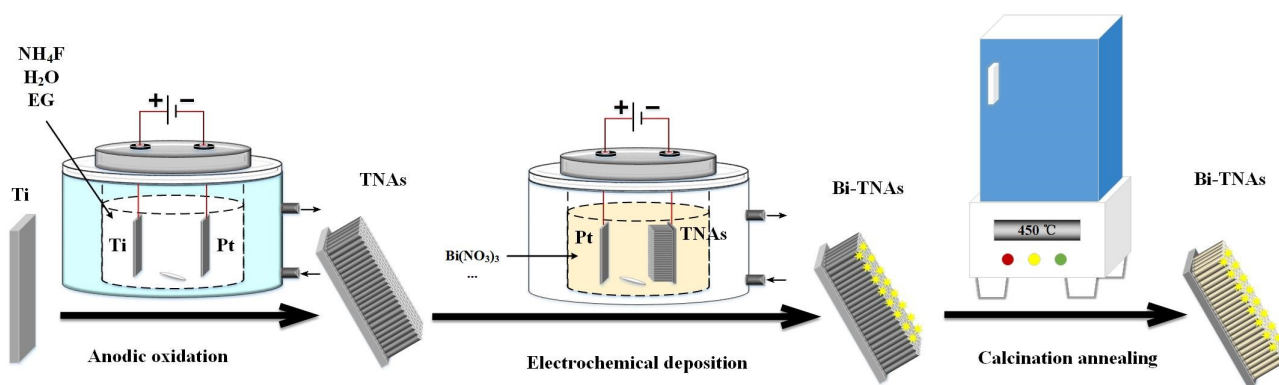

Figure S1. Schematic diagram of material preparation process.

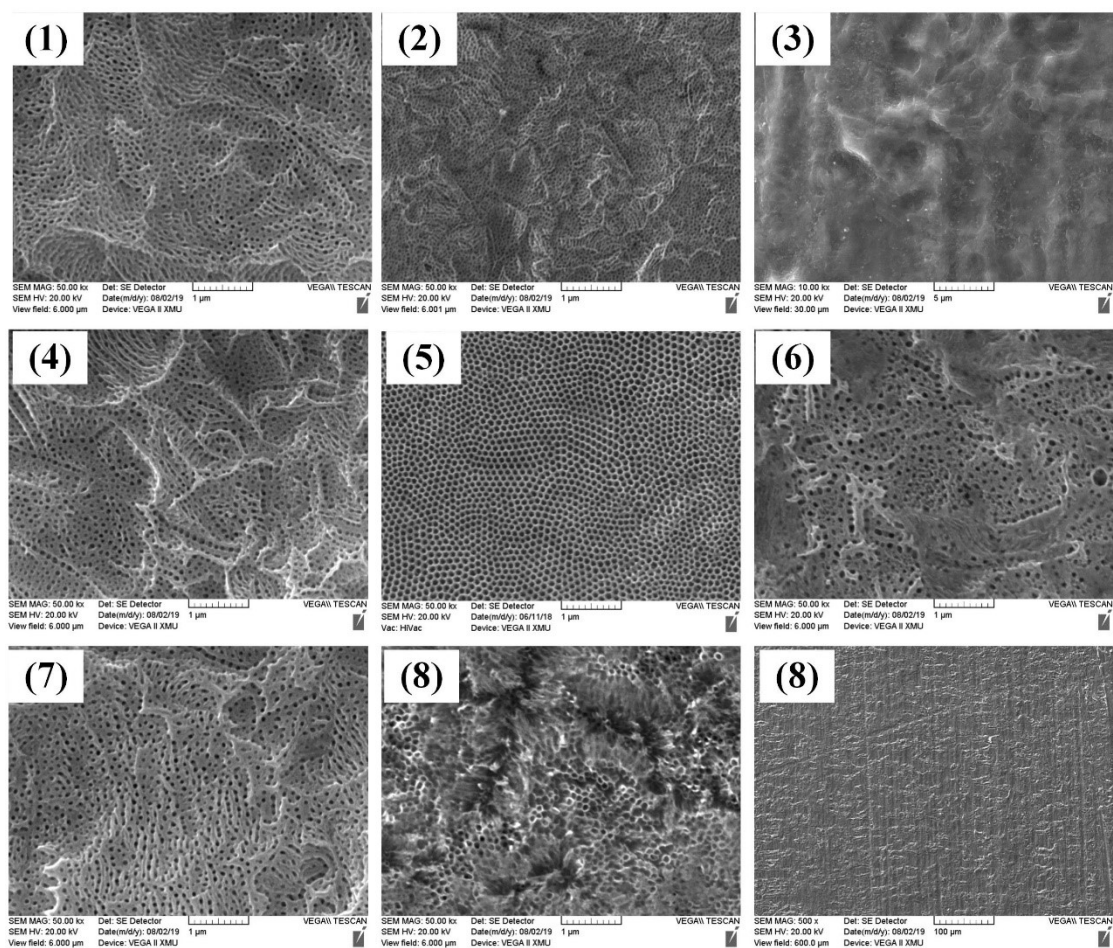

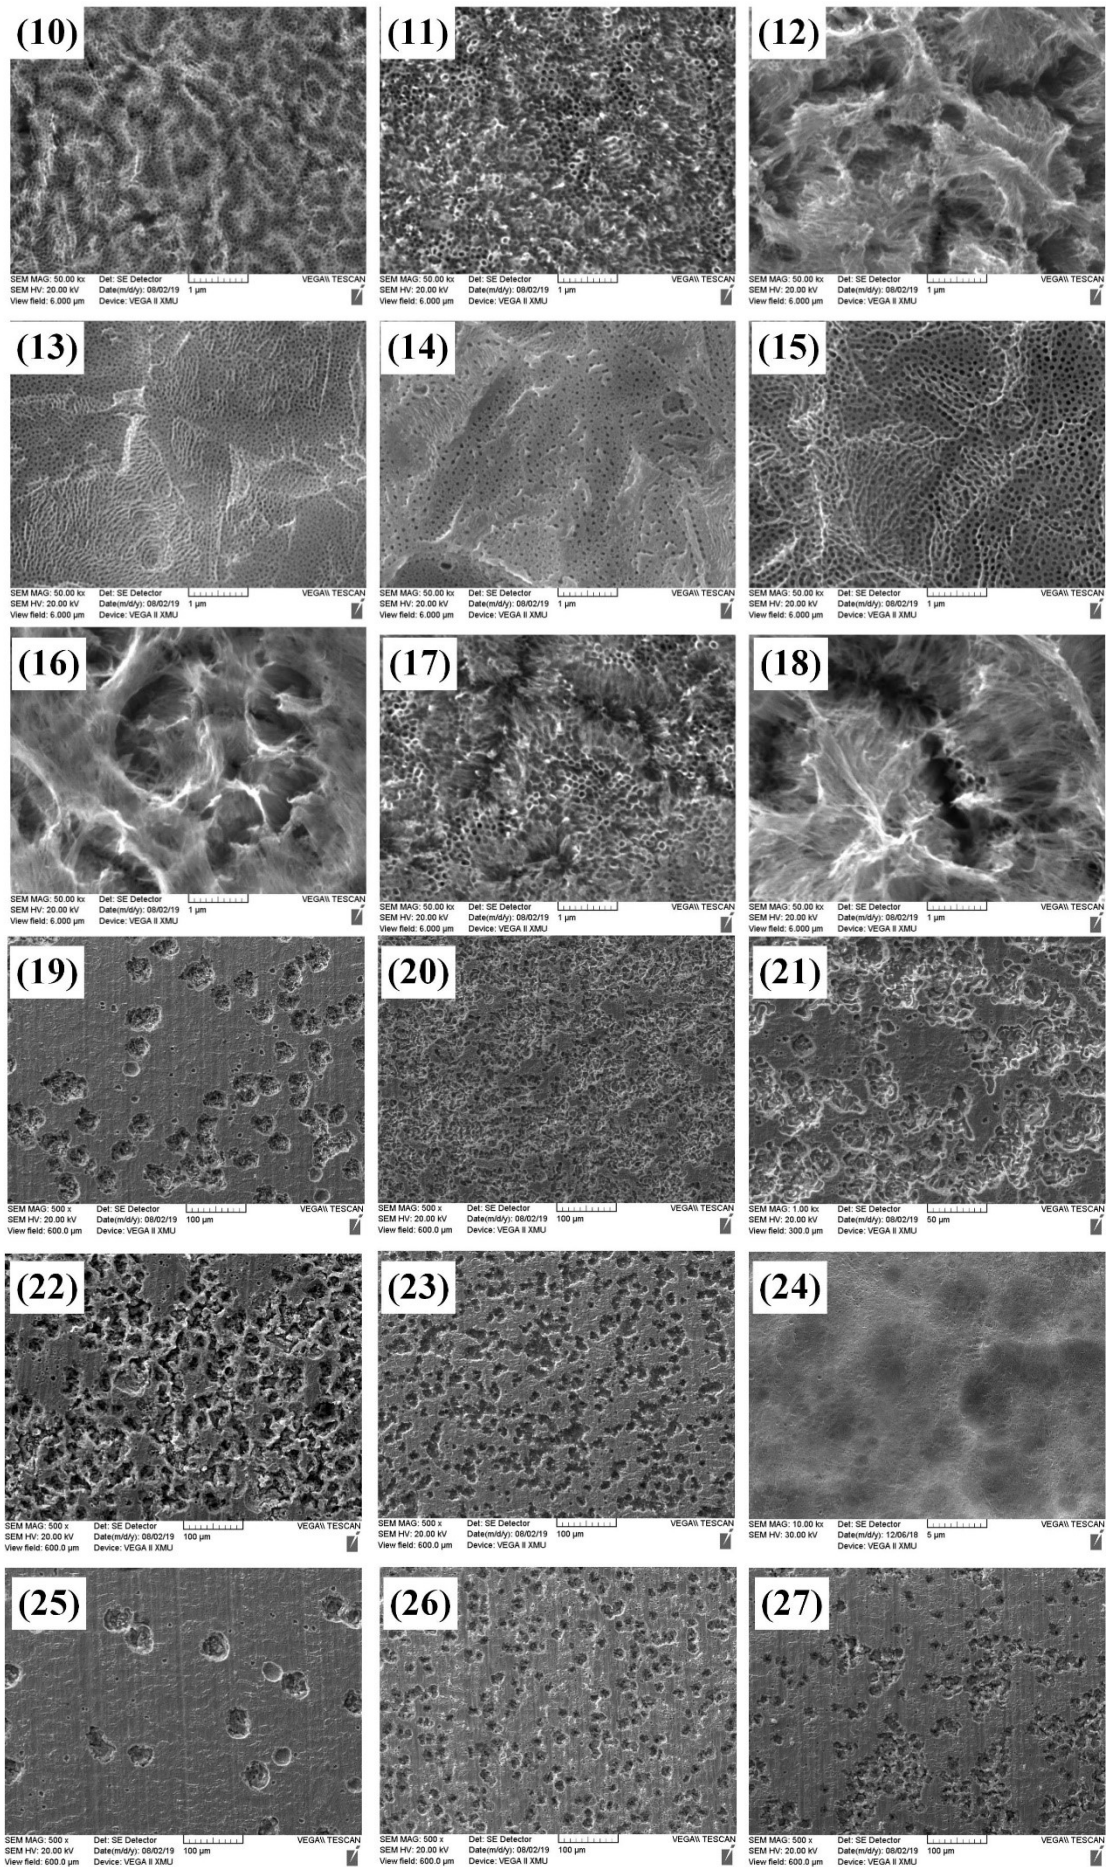

Figure S2. SEM images of TNAs orthogonal experiment samples

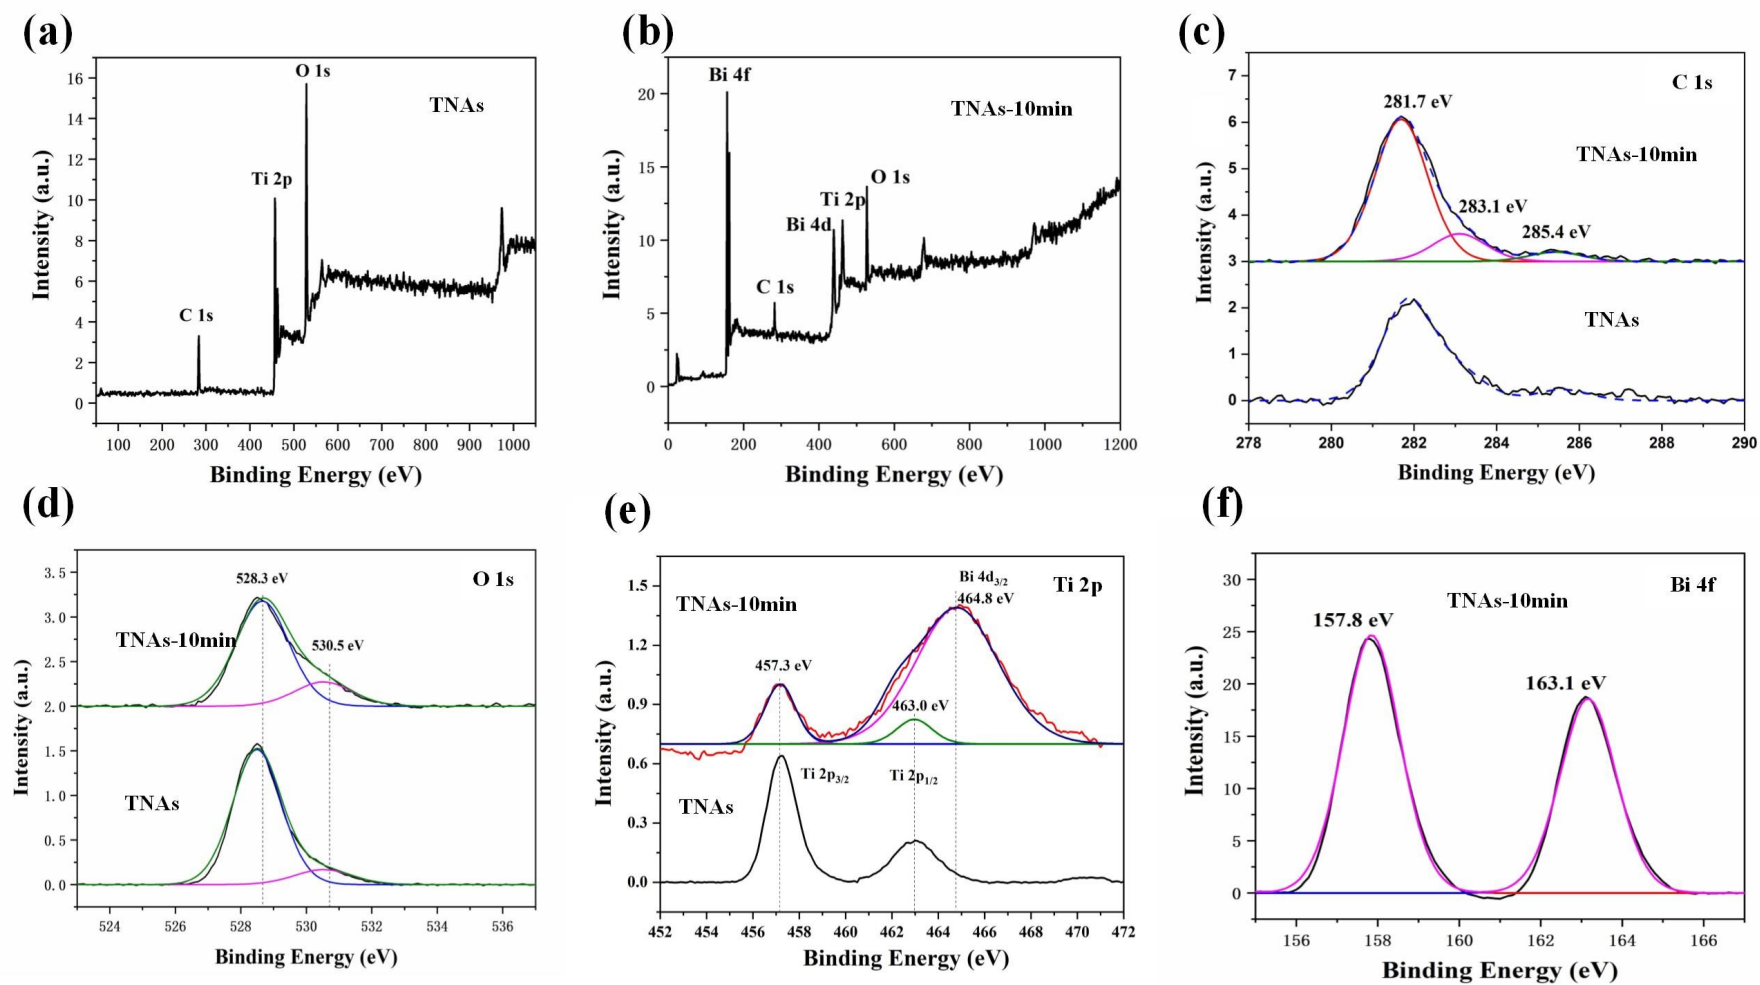

Figure S3 XPS Spectra of TNAs and TNAs-10.

(a) Survey of TNAs, (b) Survey of TNAs-10, (c) C 1s, (d) O1s, (e) Ti 2p, (f) Bi 4f

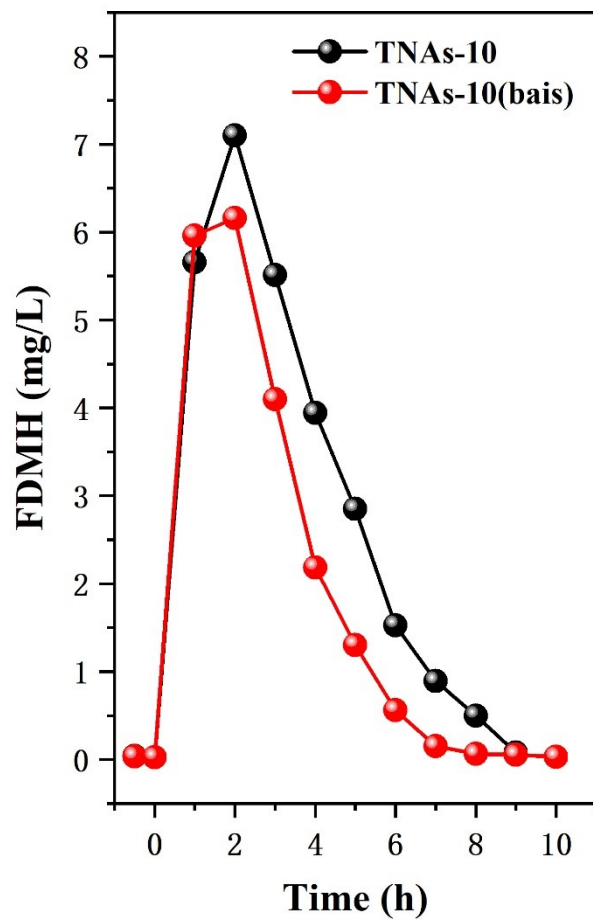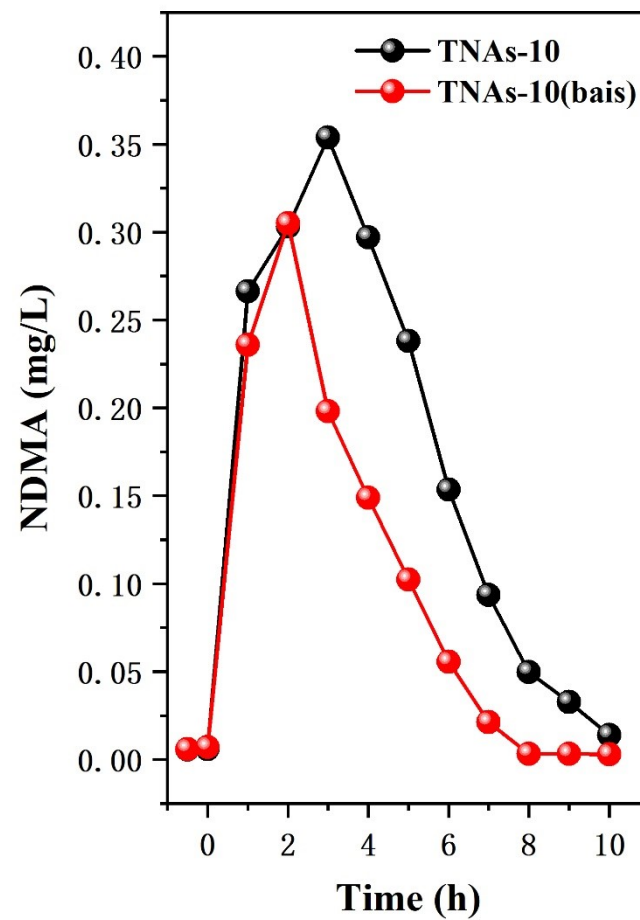



Figure S4 Degradation of FDMH and NDMA on TNAs-10 and TNAs-10 (bais)

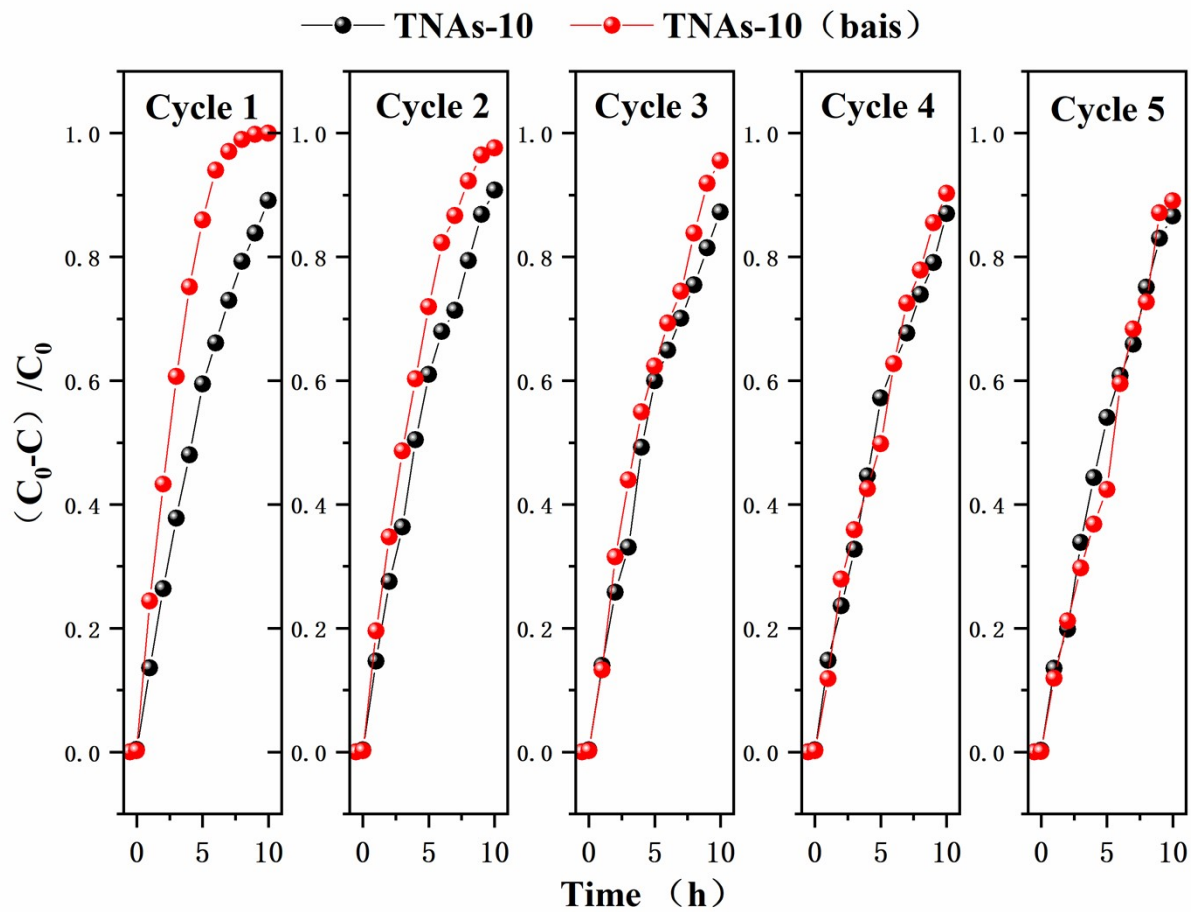

Figure S5 Cyclic photodegradation of UMDH on TNAs-10 and TNAs-10(bais) for five cycles

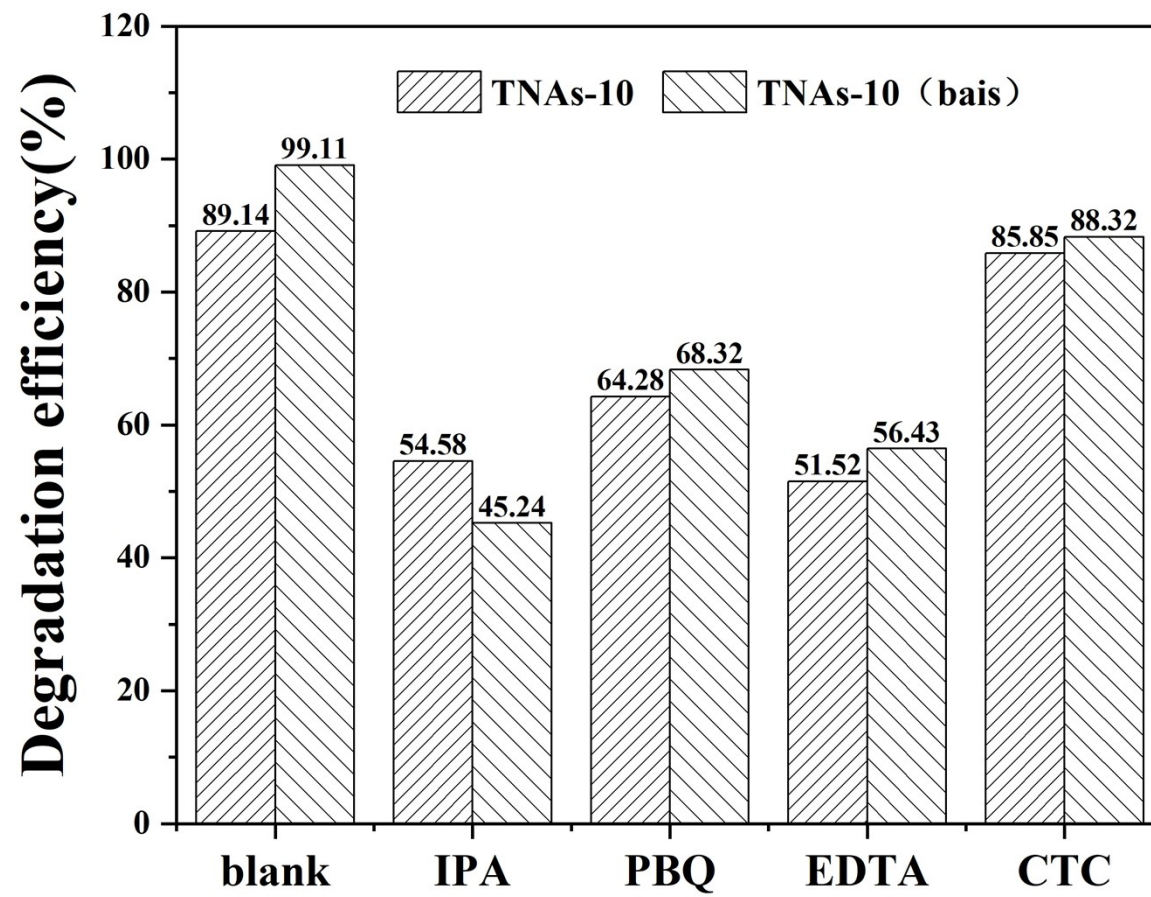

Figure S6 Active species capture experiments.

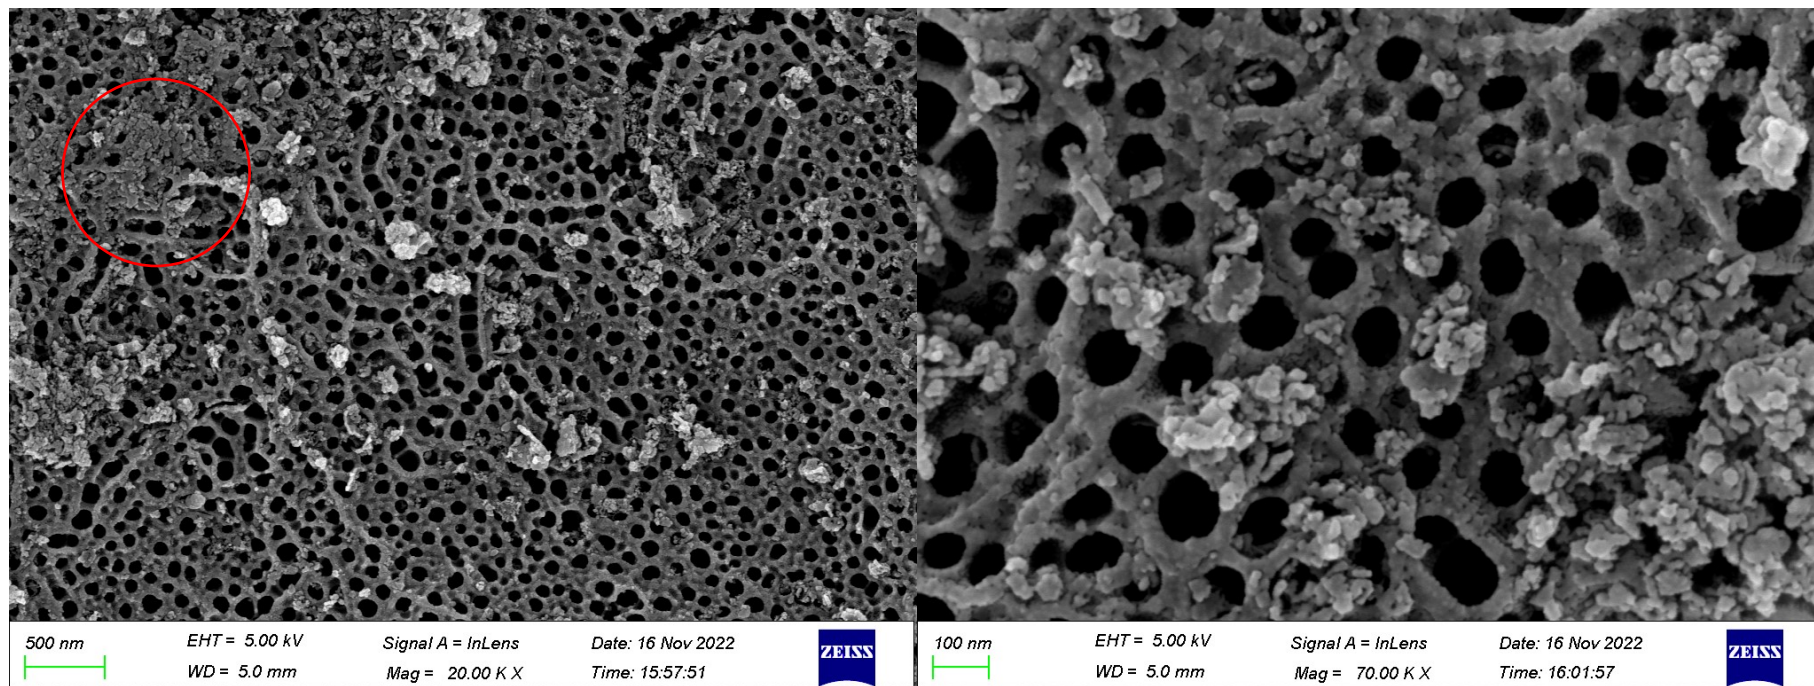

Figure S7 SEM of the TNAs-10(bias) after stability test.

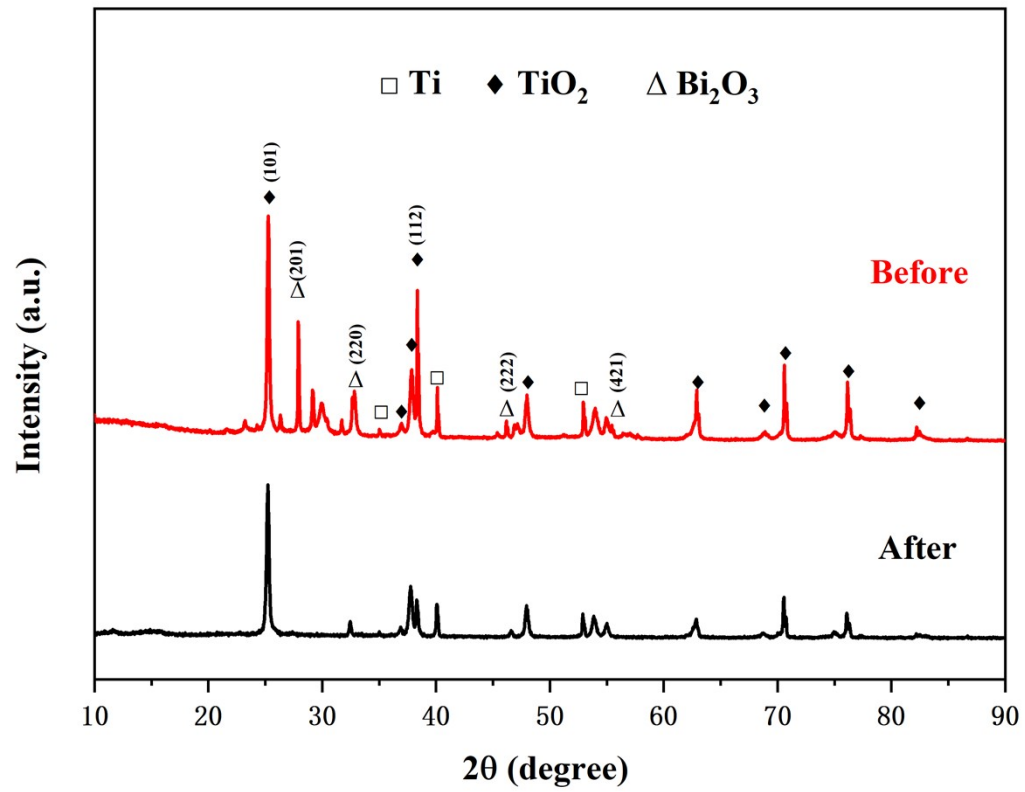

Figure S8 XRD of the TNAs-10(bias) after stability test.



**Table S1 Intuitive analysis of photocurrent density on TNAs orthogonal experiments.**

| Factor number | Solute | Concentration | H <sub>2</sub> O | pH    | Voltage | Interval | Temperature | Time  | Calcination |       |       |       |       | <i>i</i><br>(mA/cm <sup>2</sup> ) |
|---------------|--------|---------------|------------------|-------|---------|----------|-------------|-------|-------------|-------|-------|-------|-------|-----------------------------------|
| 1             | 1      | 1             | 1                | 1     | 1       | 1        | 1           | 1     | 1           | 1     | 1     | 1     | 1     | 0.1451                            |
| 2             | 1      | 1             | 1                | 1     | 2       | 2        | 2           | 2     | 2           | 2     | 2     | 2     | 2     | 0.0942                            |
| 3             | 1      | 1             | 1                | 1     | 3       | 3        | 3           | 3     | 3           | 3     | 3     | 3     | 3     | 0.0491                            |
| 4             | 1      | 2             | 2                | 2     | 1       | 1        | 1           | 2     | 2           | 2     | 3     | 3     | 3     | 0.1076                            |
| 5             | 1      | 2             | 2                | 2     | 2       | 2        | 2           | 3     | 3           | 3     | 1     | 1     | 1     | 0.0999                            |
| 6             | 1      | 2             | 2                | 2     | 3       | 3        | 3           | 1     | 1           | 1     | 2     | 2     | 2     | 0.0324                            |
| 7             | 1      | 3             | 3                | 3     | 1       | 1        | 1           | 3     | 3           | 3     | 2     | 2     | 2     | 0.0325                            |
| 8             | 1      | 3             | 3                | 3     | 2       | 2        | 2           | 1     | 1           | 1     | 3     | 3     | 3     | 0.0741                            |
| 9             | 1      | 3             | 3                | 3     | 3       | 3        | 3           | 2     | 2           | 2     | 1     | 1     | 1     | 0.0484                            |
| 10            | 2      | 1             | 2                | 3     | 1       | 2        | 3           | 1     | 2           | 3     | 1     | 2     | 3     | 0.0896                            |
| 11            | 2      | 1             | 2                | 3     | 2       | 3        | 1           | 2     | 3           | 1     | 2     | 3     | 1     | 0.1186                            |
| 12            | 2      | 1             | 2                | 3     | 3       | 1        | 2           | 3     | 1           | 2     | 3     | 1     | 2     | 0.0419                            |
| 13            | 2      | 2             | 3                | 1     | 1       | 2        | 3           | 2     | 3           | 1     | 3     | 1     | 2     | 0.1327                            |
| 14            | 2      | 2             | 3                | 1     | 2       | 3        | 1           | 3     | 1           | 2     | 1     | 2     | 3     | 0.0726                            |
| 15            | 2      | 2             | 3                | 1     | 3       | 1        | 2           | 1     | 2           | 3     | 2     | 3     | 1     | 0.0462                            |
| 16            | 2      | 3             | 1                | 2     | 1       | 2        | 3           | 3     | 1           | 2     | 2     | 3     | 1     | 0.0636                            |
| 17            | 2      | 3             | 1                | 2     | 2       | 3        | 1           | 1     | 2           | 3     | 3     | 1     | 2     | 0.0848                            |
| 18            | 2      | 3             | 1                | 2     | 3       | 1        | 2           | 2     | 3           | 1     | 1     | 2     | 3     | 0.0690                            |
| 19            | 3      | 1             | 3                | 2     | 1       | 3        | 2           | 1     | 3           | 2     | 1     | 3     | 2     | 0.0928                            |
| 20            | 3      | 1             | 3                | 2     | 2       | 1        | 3           | 2     | 1           | 3     | 2     | 1     | 3     | 0.1026                            |
| 21            | 3      | 1             | 3                | 2     | 3       | 2        | 1           | 3     | 2           | 1     | 3     | 2     | 1     | 0.0549                            |
| 22            | 3      | 2             | 1                | 3     | 1       | 3        | 2           | 2     | 1           | 3     | 3     | 2     | 1     | 0.0995                            |
| 23            | 3      | 2             | 1                | 3     | 2       | 1        | 3           | 3     | 2           | 1     | 1     | 3     | 2     | 0.1003                            |
| 24            | 3      | 2             | 1                | 3     | 3       | 2        | 1           | 1     | 3           | 2     | 2     | 1     | 3     | 0.0372                            |
| 25            | 3      | 3             | 2                | 1     | 1       | 3        | 2           | 3     | 2           | 1     | 2     | 1     | 3     | 0.0436                            |
| 26            | 3      | 3             | 2                | 1     | 2       | 1        | 3           | 1     | 3           | 2     | 3     | 2     | 1     | 0.0974                            |
| 27            | 3      | 3             | 2                | 1     | 3       | 2        | 1           | 2     | 1           | 3     | 1     | 3     | 2     | 0.0362                            |
| Mean value 1  | 0.108  | 0.088         | 0.083            | 0.080 | 0.090   | 0.083    | 0.077       | 0.110 | 0.107       | 0.118 | 0.084 | 0.082 | 0.086 |                                   |
| Mean value 2  | 0.080  | 0.113         | 0.107            | 0.111 | 0.094   | 0.076    | 0.073       | 0.090 | 0.074       | 0.073 | 0.096 | 0.104 | 0.104 |                                   |
| Mean value 3  | 0.074  | 0.061         | 0.073            | 0.071 | 0.079   | 0.104    | 0.112       | 0.062 | 0.081       | 0.071 | 0.082 | 0.076 | 0.072 |                                   |
| Range         | 0.034  | 0.052         | 0.034            | 0.040 | 0.015   | 0.028    | 0.039       | 0.048 | 0.033       | 0.047 | 0.014 | 0.028 | 0.032 |                                   |
